# Supplementary material
Source: PubMed Central journal article supplement (PMC6522370)
Supplement: EMS81917-supplement-Supplementary_Tables.pdf [file EMS81917-supplement-Supplementary_Tables.pdf]

**Supplementary Table 1. Statistical analyses of Figures 1–4.**

| Figure    | Statistical test                                                                                                                                                                                                                                                                                                                                                                                                                                                                                                                                                                                                                | Pairwise comparison                                                                                                                                                                                                                                                                                                                                                                                                                                                                                                                                                                                                                                                                                                                                                                                                                                                                                                                                                           | Test statistic                                                                                                                                                                                                                                                                                                                                                                                                                                  | P                                                                                                                                                                                                                         |
|-----------|---------------------------------------------------------------------------------------------------------------------------------------------------------------------------------------------------------------------------------------------------------------------------------------------------------------------------------------------------------------------------------------------------------------------------------------------------------------------------------------------------------------------------------------------------------------------------------------------------------------------------------|-------------------------------------------------------------------------------------------------------------------------------------------------------------------------------------------------------------------------------------------------------------------------------------------------------------------------------------------------------------------------------------------------------------------------------------------------------------------------------------------------------------------------------------------------------------------------------------------------------------------------------------------------------------------------------------------------------------------------------------------------------------------------------------------------------------------------------------------------------------------------------------------------------------------------------------------------------------------------------|-------------------------------------------------------------------------------------------------------------------------------------------------------------------------------------------------------------------------------------------------------------------------------------------------------------------------------------------------------------------------------------------------------------------------------------------------|---------------------------------------------------------------------------------------------------------------------------------------------------------------------------------------------------------------------------|
| 1a, left  | Two-way repeated-measures ANOVA<br>Time<br>Genotype<br>Time × Genotype<br>Holm-Šidák's post-hoc test<br>Holm-Šidák's post-hoc test<br>Holm-Šidák's post-hoc test                                                                                                                                                                                                                                                                                                                                                                                                                                                                | $R23E10 > Hk (Hk^1/Hk^1)$ vs. $Hk (Hk^1/Hk^1)$<br>$R23E10 > Hk (Hk^1/Hk^1)$ vs. $R23E10 (Hk^1/Hk^1)$<br>$R23E10 > Hk (Hk^1/Hk^1)$ vs. +/+                                                                                                                                                                                                                                                                                                                                                                                                                                                                                                                                                                                                                                                                                                                                                                                                                                     | $F_{23,2806} = 106.7$<br>$F_{3,122} = 19.49$<br>$F_{69,2806} = 10.45$<br>$Q_{122} = 7.826$<br>$Q_{122} = 7.078$<br>$Q_{122} = 0.2777$                                                                                                                                                                                                                                                                                                           | <0.0001<br><0.0001<br><0.0001<br><0.0001<br><0.0001<br>0.8599                                                                                                                                                             |
| 1a, right | Two-way repeated-measures ANOVA<br>Time<br>Genotype<br>Time × Genotype<br>Holm-Šidák's post-hoc test<br>Holm-Šidák's post-hoc test<br>Holm-Šidák's post-hoc test                                                                                                                                                                                                                                                                                                                                                                                                                                                                | $R23E10 > Hk^{K289M} (Hk^1/Hk^1)$ vs. $Hk^{K289M} (Hk^1/Hk^1)$<br>$R23E10 > Hk^{K289M} (Hk^1/Hk^1)$ vs. $R23E10 (Hk^1/Hk^1)$<br>$R23E10 > Hk^{K289M} (Hk^1/Hk^1)$ vs. +/+                                                                                                                                                                                                                                                                                                                                                                                                                                                                                                                                                                                                                                                                                                                                                                                                     | $F_{23,282} = 134.9$<br>$F_{3,123} = 12.76$<br>$F_{69,2829} = 11.78$<br>$Q_{123} = 0.02229$<br>$Q_{123} = 0.5163$<br>$Q_{123} = 7.299$                                                                                                                                                                                                                                                                                                          | <0.0001<br><0.0001<br><0.0001<br>0.9875<br>0.9741<br><0.0001                                                                                                                                                              |
| 1b        | One-way ANOVA<br>Genotype<br>Holm-Šidák's post-hoc test<br>Holm-Šidák's post-hoc test<br>Holm-Šidák's post-hoc test<br>Holm-Šidák's post-hoc test<br>Holm-Šidák's post-hoc test<br>Holm-Šidák's post-hoc test                                                                                                                                                                                                                                                                                                                                                                                                                   | $R23E10 > Hk (Hk^1/Hk^1)$ vs. $Hk (Hk^1/Hk^1)$<br>$R23E10 > Hk (Hk^1/Hk^1)$ vs. $R23E10 (Hk^1/Hk^1)$<br>$R23E10 > Hk (Hk^1/Hk^1)$ vs. +/+<br>$R23E10 > Hk^{K289M} (Hk^1/Hk^1)$ vs. $Hk^{K289M} (Hk^1/Hk^1)$<br>$R23E10 > Hk^{K289M} (Hk^1/Hk^1)$ vs. $R23E10 (Hk^1/Hk^1)$<br>$R23E10 > Hk^{K289M} (Hk^1/Hk^1)$ vs. +/+                                                                                                                                                                                                                                                                                                                                                                                                                                                                                                                                                                                                                                                        | $F_{7,245} = 15.81$<br>$t_{245} = 5.483$<br>$t_{245} = 4.956$<br>$t_{245} = 0.1944$<br>$t_{245} = 0.01720$<br>$t_{245} = 0.3984$<br>$t_{245} = 5.633$                                                                                                                                                                                                                                                                                           | <0.0001<br><0.0001<br><0.0001<br>0.9763<br>0.9863<br>0.9704<br><0.0001                                                                                                                                                    |
| 1d        | Mann-Whitney test<br><br>Kruskal-Wallis ANOVA<br>SD<br>Dunn's post-hoc test<br>Dunn's post-hoc test<br><br>Mann-Whitney test<br><br>Kruskal-Wallis ANOVA<br>SD<br>Dunn's post-hoc test<br>Dunn's post-hoc test<br><br>Unpaired t-test                                                                                                                                                                                                                                                                                                                                                                                           | dFB somata: SD day vs. rested flies<br><br>dFB somata: SD night vs. rested flies<br>dFB somata: SD day + night vs. rested flies<br>dFB dendrites: SD day vs. rested flies<br><br>dFB dendrites: SD night vs. rested flies<br>dFB dendrites: SD day + night vs. rested flies<br>KC dendrites: SD day + night vs. rested flies                                                                                                                                                                                                                                                                                                                                                                                                                                                                                                                                                                                                                                                  | $U = 232$<br><br>$H_2 = 22.28$<br><br>$U = 221$<br><br>$H_2 = 28.85$<br><br>$t_{36} = 1.538$                                                                                                                                                                                                                                                                                                                                                    | 0.6447<br><br><0.0001<br>0.0026<br><0.0001<br>0.6416<br><br><0.0001<br>0.0029<br><0.0001<br>0.1328                                                                                                                        |
| 2b        | One-way ANOVA<br>Genotype<br>Holm-Šidák's post-hoc test<br>Holm-Šidák's post-hoc test                                                                                                                                                                                                                                                                                                                                                                                                                                                                                                                                           | $R23E10 > MitoTimer$ vs. $R23E10$<br>$R23E10 > MitoTimer$ vs. $MitoTimer$                                                                                                                                                                                                                                                                                                                                                                                                                                                                                                                                                                                                                                                                                                                                                                                                                                                                                                     | $F_{2,91} = 7.951$<br>$t_{91} = 2.768$<br>$t_{91} = 3.875$                                                                                                                                                                                                                                                                                                                                                                                      | 0.0007<br>0.0004<br>0.0068                                                                                                                                                                                                |
| 2c        | One-way ANOVA<br>Genotype<br>Holm-Šidák's post-hoc test<br>Holm-Šidák's post-hoc test                                                                                                                                                                                                                                                                                                                                                                                                                                                                                                                                           | $R23E10 > AOX$ vs. $R23E10$<br>$R23E10 > AOX$ vs. $AOX$                                                                                                                                                                                                                                                                                                                                                                                                                                                                                                                                                                                                                                                                                                                                                                                                                                                                                                                       | $F_{2,91} = 66.92$<br>$t_{91} = 11.16$<br>$t_{91} = 8.249$                                                                                                                                                                                                                                                                                                                                                                                      | <0.0001<br><0.0001<br><0.0001                                                                                                                                                                                             |
| 2d        | One-way ANOVA<br>Genotype<br>Holm-Šidák's post-hoc test<br>Holm-Šidák's post-hoc test<br>Holm-Šidák's post-hoc test<br>Holm-Šidák's post-hoc test<br><br>Holm-Šidák's post-hoc test<br>Holm-Šidák's post-hoc test<br>Holm-Šidák's post-hoc test<br>Holm-Šidák's post-hoc test<br>Holm-Šidák's post-hoc test<br><br>Holm-Šidák's post-hoc test<br>Holm-Šidák's post-hoc test<br>Holm-Šidák's post-hoc test<br>Holm-Šidák's post-hoc test<br>Holm-Šidák's post-hoc test<br><br>Holm-Šidák's post-hoc test<br>Holm-Šidák's post-hoc test<br>Holm-Šidák's post-hoc test<br>Holm-Šidák's post-hoc test<br>Holm-Šidák's post-hoc test | $R23E10 > SOD1$ vs. $R23E10$<br>$R23E10 > SOD1$ vs. $SOD1$<br>$R23E10 > SOD1^{A4V}$ vs. $R23E10$<br>$R23E10 > SOD1^{A4V}$ vs. $SOD1^{A4V}$<br><br>$R23E10 > Hk^{RNAI}$ vs. $R23E10$<br>$R23E10 > Hk^{RNAI}$ vs. $Hk^{RNAI}$<br>$R23E10 > SOD1^{A4V}$ , $Hk^{RNAI}$ vs. $R23E10 > SOD1^{A4V}$<br>$R23E10 > SOD1^{A4V}$ , $Hk^{RNAI}$ vs. $Hk^{RNAI}$<br>$R23E10 > SOD1^{A4V}$ , $Hk^{RNAI}$ vs. $R23E10 > Hk^{RNAI}$<br><br>$R23E10 > Sh^{RNAI}$ vs. $R23E10$<br>$R23E10 > Sh^{RNAI}$ vs. $Sh^{RNAI}$<br>$R23E10 > SOD1^{A4V}$ , $Sh^{RNAI}$ vs. $R23E10 > SOD1^{A4V}$<br>$R23E10 > SOD1^{A4V}$ , $Sh^{RNAI}$ vs. $Sh^{RNAI}$<br>$R23E10 > SOD1^{A4V}$ , $Sh^{RNAI}$ vs. $R23E10 > Sh^{RNAI}$<br><br>$R23E10 > Sha^{RNAI}$ vs. $R23E10$<br>$R23E10 > Sha^{RNAI}$ vs. $Sha^{RNAI}$<br>$R23E10 > SOD1^{A4V}$ , $Sha^{RNAI}$ vs. $R23E10 > SOD1^{A4V}$<br>$R23E10 > SOD1^{A4V}$ , $Sha^{RNAI}$ vs. $Sha^{RNAI}$<br>$R23E10 > SOD1^{A4V}$ , $Sha^{RNAI}$ vs. $R23E10 > Sha^{RNAI}$ | $F_{13,420} = 18.17$<br>$t_{420} = 2.730$<br>$t_{420} = 3.131$<br>$t_{420} = 4.435$<br>$t_{420} = 4.014$<br><br>$t_{420} = 6.083$<br>$t_{420} = 5.894$<br>$t_{420} = 9.342$<br>$t_{420} = 4.622$<br>$t_{420} = 1.176$<br><br>$t_{420} = 4.978$<br>$t_{420} = 5.292$<br>$t_{420} = 7.922$<br>$t_{420} = 3.644$<br>$t_{420} = 1.647$<br><br>$t_{420} = 3.858$<br>$t_{420} = 1.862$<br>$t_{420} = 2.355$<br>$t_{420} = 3.746$<br>$t_{420} = 5.710$ | <0.0001<br>0.0390<br>0.0130<br>0.0002<br>0.0008<br><br><0.0001<br><0.0001<br><0.0001<br><0.0001<br>0.2401<br><br><0.0001<br><0.0001<br><0.0001<br>0.0027<br>0.2003<br><br>0.0015<br>0.2003<br>0.0914<br>0.0020<br><0.0001 |
| 2e        | One-way ANOVA<br>Genotype<br>Holm-Šidák's post-hoc test<br>Holm-Šidák's post-hoc test                                                                                                                                                                                                                                                                                                                                                                                                                                                                                                                                           | $R23E10$ vs. $R23E10 > Catalase$<br>$Catalase$ vs. $R23E10 > Catalase$                                                                                                                                                                                                                                                                                                                                                                                                                                                                                                                                                                                                                                                                                                                                                                                                                                                                                                        | $F_{2,88} = 20.98$<br>$t_{88} = 6.175$<br>$t_{88} = 4.802$                                                                                                                                                                                                                                                                                                                                                                                      | <0.0001<br><0.0001<br><0.0001                                                                                                                                                                                             |

|           |                                                                                                                                                                                                       |                                                                                                                                                                                                                                    |                                                                                                                                                       |                                                                                     |
|-----------|-------------------------------------------------------------------------------------------------------------------------------------------------------------------------------------------------------|------------------------------------------------------------------------------------------------------------------------------------------------------------------------------------------------------------------------------------|-------------------------------------------------------------------------------------------------------------------------------------------------------|-------------------------------------------------------------------------------------|
| <b>3b</b> | $\chi^2$ test<br>Fraction asleep<br>Fisher's exact test<br>Fisher's exact test<br>Fisher's exact test<br>Fisher's exact test                                                                          | <i>R23E10 &gt; miniSOG vs. R23E10</i><br><i>R23E10 &gt; miniSOG vs. miniSOG</i><br><i>R23E10 &gt; miniSOG vs. R23E10 &gt; miniSOG, Hk<sup>RNAi</sup></i><br><i>R23E10 &gt; miniSOG vs. R23E10 &gt; miniSOG, Sha<sup>RNAi</sup></i> | $\chi^2_4 = 38.31$                                                                                                                                    | <0.0001<br><0.0001<br><0.0001<br>0.0030<br>0.3622                                   |
| <b>3c</b> | Kruskal-Wallis ANOVA<br>Genotype<br>Dunn's post-hoc test<br>Dunn's post-hoc test<br>Dunn's post-hoc test<br>Dunn's post-hoc test                                                                      | <i>R23E10 &gt; miniSOG vs. R23E10</i><br><i>R23E10 &gt; miniSOG vs. miniSOG</i><br><i>R23E10 &gt; miniSOG vs., R23E10 &gt; miniSOG Hk<sup>RNAi</sup></i><br><i>R23E10 &gt; miniSOG vs. R23E10 &gt; miniSOG, Sha<sup>RNAi</sup></i> | $H_4 = 44.11$                                                                                                                                         | <0.0001<br><0.0001<br><0.0001<br>0.0019<br>>0.9999                                  |
| <b>3d</b> | Two-way repeated-measures ANOVA<br>Time<br>Genotype<br>Time $\times$ Genotype<br>Holm-Šidák's post-hoc test<br>Holm-Šidák's post-hoc test<br>Holm-Šidák's post-hoc test<br>Holm-Šidák's post-hoc test | ZT 10: <i>R23E10 &gt; miniSOG vs. R23E10</i><br>ZT 10: <i>R23E10 &gt; miniSOG vs. miniSOG</i><br>ZT 10.5: <i>R23E10 &gt; miniSOG vs. R23E10</i><br>ZT 10.5: <i>R23E10 &gt; miniSOG vs. miniSOG</i>                                 | $F_{7,462} = 194.3$<br>$F_{2,66} = 4.206$<br>$F_{14,462} = 7.480$<br>$t_{528} = 5.054$<br>$t_{528} = 5.333$<br>$t_{528} = 4.752$<br>$t_{528} = 5.152$ | <0.0001<br>0.0191<br><0.0001<br><0.0001<br><0.0001<br><0.0001<br><0.0001<br><0.0001 |
| <b>4b</b> | Paired <i>t</i> -test<br>Paired <i>t</i> -test                                                                                                                                                        | $R_m$<br>$T_m$                                                                                                                                                                                                                     | $t_{10} = 5.962$<br>$t_{10} = 3.696$                                                                                                                  | 0.0001<br>0.0041                                                                    |
| <b>4c</b> | Two-way repeated-measures ANOVA<br>Current<br>Illumination<br>Current $\times$ Illumination<br><br>Kolmogorov-Smirnov test                                                                            |                                                                                                                                                                                                                                    | $F_{24,480} = 25.87$<br>$F_{1,20} = 2.993$<br>$F_{24,480} = 2.147$<br><br>$D = 0.4101$                                                                | <0.0001<br>0.0990<br>0.0014<br><br><0.0001                                          |
| <b>4e</b> | Paired <i>t</i> -test<br>Wilcoxon signed-rank test<br>Wilcoxon signed-rank test                                                                                                                       | $I_A$<br>$T_{fast}$<br>$T_{slow}$                                                                                                                                                                                                  | $t_{13} = 0.3533$<br>$W = 71$<br>$W = 24$                                                                                                             | 0.7295<br>0.0245<br>0.3804                                                          |
| <b>4g</b> | Unpaired <i>t</i> -test<br>Unpaired <i>t</i> -test                                                                                                                                                    | $R_m$<br>$T_m$                                                                                                                                                                                                                     | $t_{19} = 2.127$<br>$t_{19} = 0.6939$                                                                                                                 | 0.0467<br>0.4962                                                                    |
| <b>4h</b> | Two-way repeated-measures ANOVA<br>Current<br>Genotype<br>Current $\times$ Genotype<br><br>Kolmogorov-Smirnov test                                                                                    |                                                                                                                                                                                                                                    | $F_{24,456} = 25.70$<br>$F_{1,19} = 6.193$<br>$F_{24,456} = 3.482$<br><br>$D = 0.3918$                                                                | <0.0001<br>0.0223<br><0.0001<br><br><0.0001                                         |
| <b>4j</b> | Unpaired <i>t</i> -test<br>Unpaired <i>t</i> -test<br>Mann-Whitney test                                                                                                                               | $I_A$<br>$T_{fast}$<br>$T_{slow}$                                                                                                                                                                                                  | $t_{25} = 0.02189$<br>$t_{25} = 2.993$<br>$U = 58$                                                                                                    | 0.9827<br>0.0061<br>0.1257                                                          |
| <b>4l</b> | Mann-Whitney test<br>Mann-Whitney test                                                                                                                                                                | $R_m$<br>$T_m$                                                                                                                                                                                                                     | $U = 22$<br>$U = 32.50$                                                                                                                               | 0.0023<br>0.0166                                                                    |
| <b>4m</b> | Two-way repeated-measures ANOVA<br>Current<br>Genotype<br>Current $\times$ Genotype<br><br>Kolmogorov-Smirnov test                                                                                    |                                                                                                                                                                                                                                    | $F_{24,552} = 55.27$<br>$F_{1,23} = 16.60$<br>$F_{24,552} = 15.15$<br><br>$D = 0.3208$                                                                | <0.0001<br>0.0005<br><0.0001<br><br><0.0001                                         |
| <b>4o</b> | Unpaired <i>t</i> -test<br>Unpaired <i>t</i> -test, Welch-corrected<br>Mann-Whitney test                                                                                                              | $I_A$<br>$T_{fast}$<br>$T_{slow}$                                                                                                                                                                                                  | $t_{16} = 0.7079$<br>$t_{10,56} = 3.903$<br>$U = 29$                                                                                                  | 0.4892<br>0.0027<br>0.3401                                                          |

**Supplementary Table 2. Statistical analyses of Extended Data Figures 1–4.**

| Extended Data Figure | Statistical test                                                                                                                                  | Pairwise comparison-                                                                                                                                                                                                                   | Test statistic                                                                                            | <i>P</i>                                          |
|----------------------|---------------------------------------------------------------------------------------------------------------------------------------------------|----------------------------------------------------------------------------------------------------------------------------------------------------------------------------------------------------------------------------------------|-----------------------------------------------------------------------------------------------------------|---------------------------------------------------|
| 1a                   | Kruskal-Wallis ANOVA<br>Genotype<br>Dunn's post-hoc test<br>Dunn's post-hoc test<br>Dunn's post-hoc test<br>Dunn's post-hoc test                  | <i>R23E10</i> > <i>SOD1</i> vs. <i>R23E10</i><br><i>R23E10</i> > <i>SOD1</i> vs. <i>SOD1</i><br><i>R23E10</i> > <i>SOD1<sup>AAV</sup></i> vs. <i>R23E10</i><br><i>R23E10</i> > <i>SOD1<sup>AAV</sup></i> vs. <i>SOD1<sup>AAV</sup></i> | $H_4 = 35.39$                                                                                             | <0.0001<br>0.2612<br>0.0003<br>0.0069<br>>0.9999  |
| 1b, left             | Two-way ANOVA<br>Vibrational Force<br>Genotype<br>Vibrational Force × Genotype                                                                    |                                                                                                                                                                                                                                        | $F_{3,60} = 46.37$<br>$F_{2,60} = 0.6036$<br>$F_{6,60} = 0.1624$                                          | <0.0001<br>0.5501<br>0.9857                       |
| 1b, right            | Two-way ANOVA<br>Vibrational Force<br>Genotype<br>Vibrational Force × Genotype                                                                    |                                                                                                                                                                                                                                        | $F_{3,60} = 33.13$<br>$F_{2,60} = 1.424$<br>$F_{6,60} = 0.08031$                                          | <0.0001<br>0.2487<br>0.9979                       |
| 1c                   | Two-way repeated-measures ANOVA<br>Illumination<br>Genotype<br>Illumination × Genotype                                                            |                                                                                                                                                                                                                                        | $F_{1,131} = 0.06064$<br>$F_{4,131} = 2.114$<br>$F_{4,131} = 1.213$                                       | 0.8059<br>0.0827<br>0.3086                        |
| 2a                   | Kruskal-Wallis ANOVA<br>Genotype<br>Dunn's post-hoc test<br>Dunn's post-hoc test<br>Dunn's post-hoc test<br>Dunn's post-hoc test                  | <i>cry</i> > <i>SOD1</i> vs. <i>cry</i><br><i>cry</i> > <i>SOD1</i> vs. <i>SOD1</i><br><i>cry</i> > <i>SOD1<sup>AAV</sup></i> vs. <i>cry</i><br><i>cry</i> > <i>SOD1<sup>AAV</sup></i> vs. <i>SOD1<sup>AAV</sup></i>                   | $H_4 = 27.67$                                                                                             | <0.0001<br>0.2600<br>0.8411<br>0.1426<br>>0.9999  |
| 2b                   | Kruskal-Wallis ANOVA<br>Genotype<br>Dunn's post-hoc test<br>Dunn's post-hoc test<br>Dunn's post-hoc test<br>Dunn's post-hoc test                  | <i>pdf</i> > <i>SOD1</i> vs. <i>pdf</i><br><i>pdf</i> > <i>SOD1</i> vs. <i>SOD1</i><br><i>pdf</i> > <i>SOD1<sup>AAV</sup></i> vs. <i>pdf</i><br><i>pdf</i> > <i>SOD1<sup>AAV</sup></i> vs. <i>SOD1<sup>AAV</sup></i>                   | $H_4 = 17.02$                                                                                             | 0.0019<br>>0.9999<br>0.0069<br>>0.9999<br>0.1732  |
| 2c                   | One-way ANOVA<br>Genotype<br>Holm-Šidák's post-hoc test<br>Holm-Šidák's post-hoc test<br>Holm-Šidák's post-hoc test<br>Holm-Šidák's post-hoc test | <i>OK107</i> > <i>SOD1</i> vs. <i>OK107</i><br><i>OK107</i> > <i>SOD1</i> vs. <i>SOD1</i><br><i>OK107</i> > <i>SOD1<sup>AAV</sup></i> vs. <i>OK107</i><br><i>OK107</i> > <i>SOD1<sup>AAV</sup></i> vs. <i>SOD1<sup>AAV</sup></i>       | $F_{4,145} = 3.957$<br>$t_{145} = 1.194$<br>$t_{145} = 2.425$<br>$t_{145} = 2.451$<br>$t_{145} = 1.084$   | 0.0045<br>0.4139<br>0.0603<br>0.0603<br>0.4139    |
| 2d                   | Kruskal-Wallis ANOVA<br>Genotype<br>Dunn's post-hoc test<br>Dunn's post-hoc test<br>Dunn's post-hoc test<br>Dunn's post-hoc test                  | <i>GH146</i> > <i>SOD1</i> vs. <i>GH146</i><br><i>GH146</i> > <i>SOD1</i> vs. <i>SOD1</i><br><i>GH146</i> > <i>SOD1<sup>AAV</sup></i> vs. <i>GH146</i><br><i>GH146</i> > <i>SOD1<sup>AAV</sup></i> vs. <i>SOD1<sup>AAV</sup></i>       | $H_4 = 6.535$                                                                                             | <0.0001<br>0.0452<br>0.6901<br>>0.9999<br>>0.9999 |
| 3                    | One-way ANOVA<br>Genotype<br>Holm-Šidák's post-hoc test<br>Holm-Šidák's post-hoc test<br>Holm-Šidák's post-hoc test<br>Holm-Šidák's post-hoc test | <i>R23E10</i> > <i>7238GD</i> vs. <i>R23E10</i><br><i>R23E10</i> > <i>7238GD</i> vs. <i>7238GD</i><br><i>R23E10</i> > <i>105172KK</i> vs. <i>R23E10</i><br><i>R23E10</i> > <i>105172KK</i> vs. <i>105172KK</i>                         | $F_{4,146} = 5.475$<br>$t_{146} = 2.012$<br>$t_{146} = 0.9673$<br>$t_{146} = 3.484$<br>$t_{146} = 0.7701$ | 0.0004<br>0.1718<br>0.9673<br>0.0026<br>0.9034    |
| 4b                   | Paired <i>t</i> -test<br>Paired <i>t</i> -test                                                                                                    | $F_m$<br>$T_m$                                                                                                                                                                                                                         | $t_8 = 3.366$<br>$t_8 = 2.069$                                                                            | 0.0098<br>0.0723                                  |
| 4c                   | Two-way repeated-measures ANOVA<br>Current<br>Illumination<br>Current × Illumination<br><br>Kolmogorov-Smirnov test                               |                                                                                                                                                                                                                                        | $F_{24,384} = 18.05$<br>$F_{1,16} = 0.3604$<br>$F_{24,384} = 0.3568$<br><br>$D = 0.09243$                 | <0.0001<br>0.5567<br>0.9982<br><br>0.0947         |
| 4e                   | Wilcoxon signed-rank test<br>Wilcoxon signed-rank test<br>Wilcoxon signed-rank test                                                               | $I_A$<br>$T_{fast}$<br>$T_{slow}$                                                                                                                                                                                                      | $W = 18$<br>$W = 71$<br>$W = -35$                                                                         | 0.8040<br>0.6387<br>0.2958                        |
